# Supplementary material
Source: PubMed Central journal article supplement (PMC3986189)
Supplement: 1403599111_sapp.pdf [file 1403599111_sapp.pdf]

**Supplementary Material:**  
**Homolog Detection Using Global Sequence Properties:**  
**An Alternate View of Structural Encoding**  
**in Protein Sequences**  
**H.A. Scheraga and S. Rackovsky**

1. The Definition of  $\Delta_k(P,Q)$

The unnormalized sine and cosine Fourier coefficients for wave number  $k$  and property factor  $l$  are denoted by  $a_k^{(l)}$  and  $b_k^{(l)}$  respectively. Standard scores are defined in terms of the averages of the Fourier coefficients over an ensemble of all possible permutations of the N-member protein sequence, denoted by angle brackets, and the corresponding standard deviation, as follows:

$$Z(a_k^{(l)}) = \frac{a_k^{(l)} - \langle a_k^{(l)} \rangle_N}{\sigma(a_k^{(l)})}$$

with an analogous expression for  $Z(b_k^{(l)})$ . Based on results obtained in Reference 13, we define the  $k$ -dependent distance function as follows:

$$\begin{aligned} \Delta_k(P,Q) &= \left[ \sum_{l=1}^{10} \{Z(b_k^{(l)}[P]) - Z(b_k^{(l)}[Q])\}^2 \right]^{1/2} \quad (k=1,3,4,6) \\ &= \left[ \sum_{l=1}^{10} (\{Z(a_k^{(l)}[P]) - Z(a_k^{(l)}[Q])\}^2 + \{Z(b_k^{(l)}[P]) - Z(b_k^{(l)}[Q])\}^2) \right]^{1/2} \quad (k=2) \\ &= \left[ \sum_{l=1}^{10} \{Z(a_k^{(l)}[P]) - Z(a_k^{(l)}[Q])\}^2 \right]^{1/2} \quad (k=5) \\ &= \left[ \sum_{l=1}^{10} \{Z(b_0^{(l)}[P]) - Z(b_0^{(l)}[Q])\}^2 \right]^{1/2} \quad (k=0) \end{aligned}$$

**Figure S1. CASP8 Targets and Closest Database Structures**

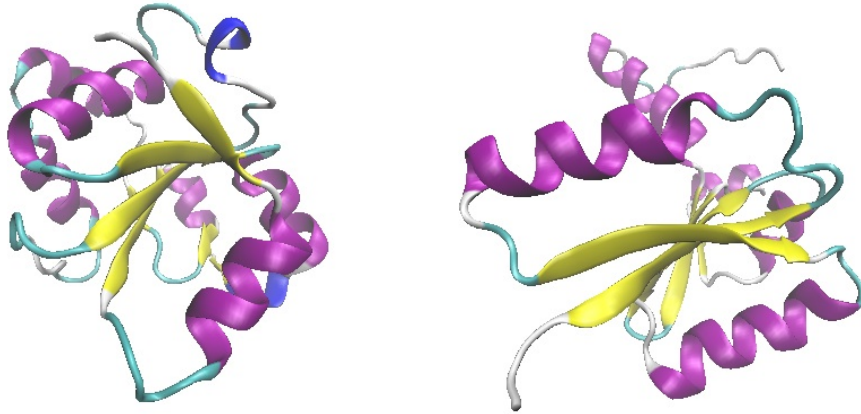

a. CASP8 target T0389 (left) and the minimum-distance structure in the database (right).

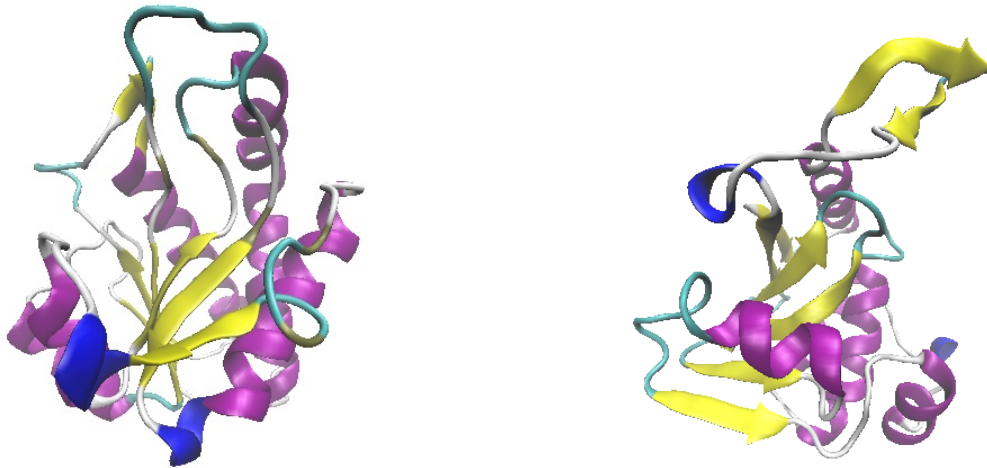

b. CASP8 target T0425 (left) and the minimum-distance structure in the database (right).

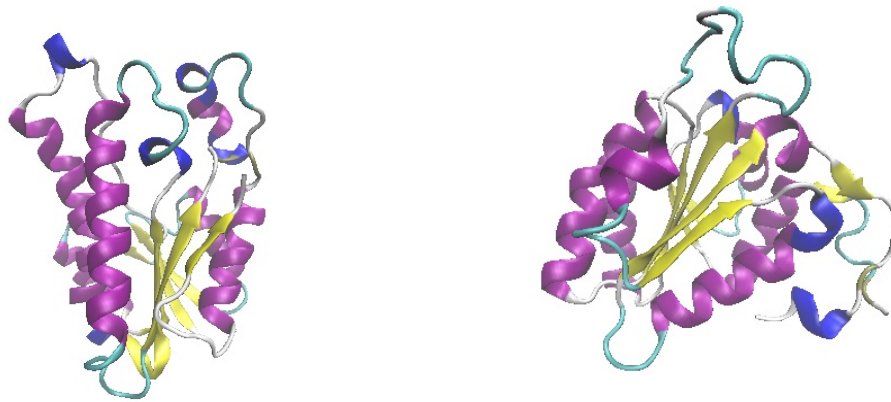

c. CASP8 target T0433 (left) and the minimum-distance structure in the database (right).

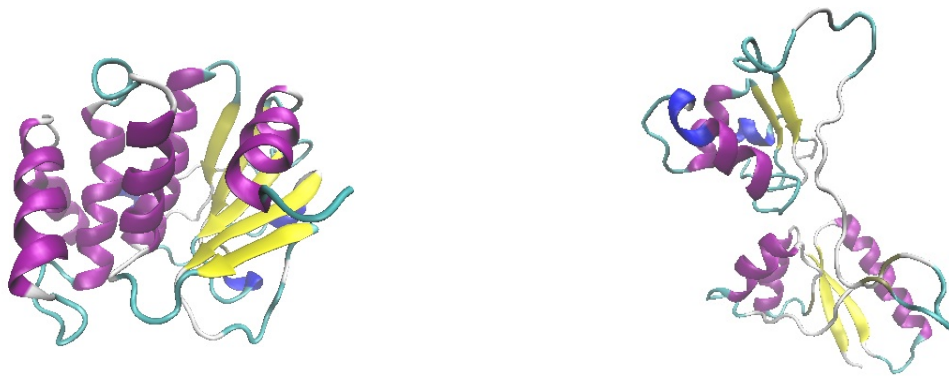

d. CASP8 target T0457 (left) and the minimum-distance structure in the database (right).

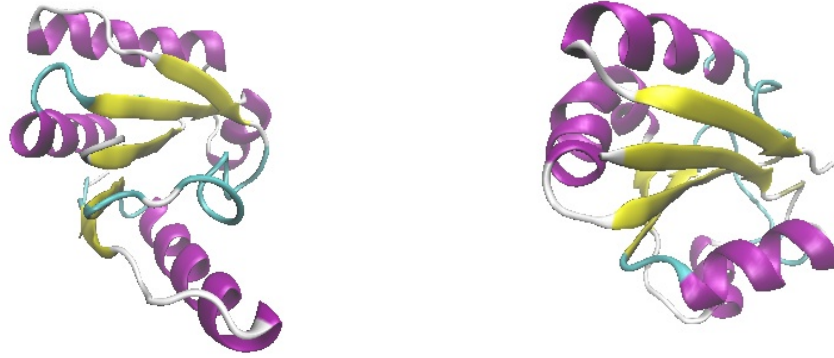

e. CASP8 target T0507 (left) and the minimum-distance structure in the database (right).
